# Supplementary material for: Oral Administration of Lactobacillus sakei CVL-001 Improves Recovery from Dextran Sulfate Sodium-Induced Colitis in Mice by Microbiota Modulation
Source: MDPI journal article supplement (doi:10.3390/microorganisms11051359), 2023-05-22
Supplement: s1 [file s1]

**Supplementary Figure S1.** Evaluation of mRNA expression of cytokine and genes coding for intracellular junction with DSS-induced colitis under co-housed condition

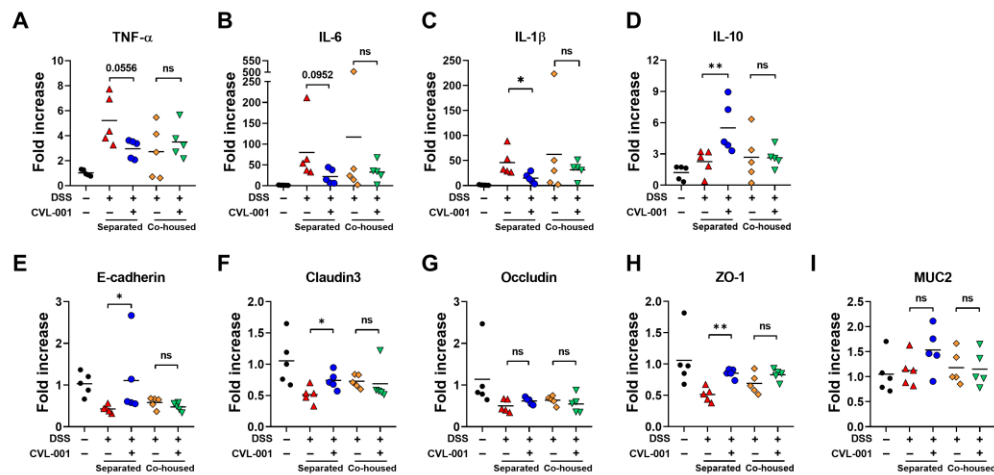

**Figure S1.** mRNA extracted from colonic tissue prepared for real-time PCR. The mRNA levels of (A) *TNF- $\alpha$* , (B) *IL-6*, (C) *IL-1 $\beta$* , (D) *IL-10* and genes coding for (E) E-cadherin, (F) claudin3, (G) occludin, (H) ZO-1, and (I) MUC2 were evaluated using each primer and normalized against GAPDH (n = 5). The significance of differences between the group was assessed using Mann-Whitney U-test, with the level of significance set at  $P < 0.05$  (\*). PCR, polymerase chain reaction; TNF, tumor necrosis factor; IL, interleukin; ZO, zonula occludens; MUC, mucin; GAPDH, glyceraldehyde 3-phosphate dehydrogenase; DSS, dextran sulfate sodium.
